1  
2 **Novelty-induced frontal-STN networks in Parkinson's disease**  
3 **Running Title: Novelty-induced networks in Parkinson's disease**

4  
5 Rachel C Cole<sup>1</sup>, Arturo I Espinoza<sup>1</sup>, Arun Singh<sup>2</sup>, Joel I Berger<sup>3</sup>, James F Cavanagh<sup>4</sup>, Jan R  
6 Wessel<sup>1,5,6</sup>, Jeremy D Greenlee<sup>3,6</sup>, Nandakumar S Narayanan<sup>1,6</sup>  
7

8 <sup>1</sup>Department of Neurology, Carver College of Medicine, University of Iowa, Iowa City, IA,  
9 52242, <sup>2</sup>Division of Basic Biomedical Sciences, Sanford School of Medicine, University of  
10 South Dakota, Vermillion, SD, 57069, <sup>3</sup>Department of Neurosurgery, University of Iowa, Iowa  
11 City, IA, 52242, <sup>4</sup>Department of Psychology, University of New Mexico, Albuquerque, New  
12 Mexico, 87131, <sup>5</sup>Department of Psychological and Brain Sciences, University of Iowa, Iowa  
13 City, IA, 52242, <sup>6</sup>Iowa Neuroscience Institute, Carver College of Medicine, University of Iowa,  
14 Iowa City, IA, 52242  
15  
16  
17  
18  
19  
20  
21  
22  
23  
24  
25  
26  
27  
28  
29  
30  
31  
32

33 **\*Corresponding Author**

34 Nandakumar Narayanan  
35 [nandakumar-narayanan@uiowa.edu](mailto:nandakumar-narayanan@uiowa.edu)  
36  
37

38 **Abstract**

39 Novelty detection is a primitive subcomponent of cognitive control that is deficient in  
40 Parkinson's disease (PD) patients with cognitive dysfunction. Here, we studied novelty-response  
41 mechanisms in PD. In participants with PD, we recorded from cortical circuits with scalp-based  
42 electroencephalography (EEG) and from subcortical circuits using intraoperative  
43 neurophysiology during surgeries for implantation of deep-brain stimulation (DBS) electrodes.  
44 We report three major results. First, novel auditory stimuli triggered midfrontal low-frequency  
45 rhythms; of these, 1-4 Hz "delta" rhythms were linked to novelty-associated slowing whereas 4-7  
46 Hz "theta" rhythms were specifically attenuated in PD. Second, 32% of subthalamic nucleus  
47 (STN) neurons were response-modulated; nearly all (94%) of these were also modulated by  
48 novel stimuli. Third, response-modulated STN neurons were coherent with midfrontal 1-4 Hz  
49 activity. These findings link scalp-based measurements of neural activity with neuronal activity  
50 in the STN. Our results provide insight into midfrontal cognitive control mechanisms and how  
51 purported hyperdirect fronto-basal ganglia circuits evaluate new information.

52

53 **Keywords**

54 cognitive control, neuronal coherence, neuronal spiking, oddball task, prefrontal cortex

55 **INTRODUCTION**

56 New information requires careful consideration. Indeed, when the brain evaluates novel  
57 information, it recruits cognitive-control processes reflected by midfrontal low-frequency “delta”  
58 (1-4 Hz) and “theta” (4-7) Hz activity (Cavanagh & Frank, 2014; Solís-Vivanco et al., 2018). In  
59 the prefrontal cortex, low-frequency activity encodes cognitive functions (Cavanagh et al., 2012;  
60 Cooper et al., 2019; Messel et al., 2021), as well as engages single neurons in subcortical regions  
61 of the brain (Kim & Narayanan, 2019; Mikell et al., 2014; Narayanan et al., 2013). A better  
62 understanding of the systems-level interactions underlying control may contribute to better  
63 treatment of disorders associated with control deficits, such as Parkinson’s disease (PD). While  
64 PD is primarily associated with motor control issues, there are also profound disturbances in  
65 cognitive control. To elucidate the arc between endogenous elicitation and exogenous exertion,  
66 we examined the systems-level interactions between midfrontal field potentials and subcortical  
67 neurons in PD patients.

68 We utilized the well-known oddball task to evoke novelty-incuded control (Parmentier, 2014;  
69 Parmentier & Hebrero, 2013). In this task, participants must respond to a commonly-occurring,  
70 standard stimulus on most trials. Novel stimuli can trigger a cascade of processes including the  
71 orienting response (Sokolov, 1962), motor effects, and cognitive control (Fan, 2014). When  
72 novel distractors interrupt a primary task, responses are slower and less accurate (Parmentier &  
73 Hebrero, 2013; Wessel & Huber, 2019). When cognitive control is appropriately engaged, this  
74 novelty-induced distraction can be reduced (e.g. a control rule could determine that the  
75 distractors are irrelevant and thus should be ignored) (Parmentier & Hebrero, 2013). Thus,  
76 novelty-induced orienting signals a generic need for control.

77 In electroencephalography (EEG) studies, novel stimuli and the subsequent orienting response  
78 evoke characteristic event-related potential (ERP) signatures in the midfrontal cortex (Debener et  
79 al., 2005; Polich, 2007; Ranganath & Rainer, 2003). Cortical responses to novel stimuli involve  
80 midfrontal low-frequency oscillations in the delta (1-4 Hz) and the theta (4-7 Hz) range  
81 (Cavanagh et al., 2012; Wessel et al., 2016). Cavanagh and Frank (2014) proposed that these  
82 midfrontal oscillations reflect the recruitment of cognitive-control processes, however, the  
83 precise bands and topography of novelty-related slowing, particularly in PD patients, is  
84 undetermined. Frontal activity may serve as a mechanism by which neurons exert top-down  
85 control across the brain (Cavanagh & Frank, 2014), including subcortical networks in the basal  
86 ganglia (Zink et al., 2006). These subcortical basal ganglia networks can be modulated by  
87 novelty; indeed, a human intraoperative study by Mikell and colleagues (2014) found that  
88 subcortical neurons in the substantia nigra increased firing more following infrequent novel  
89 sounds than frequent standard sounds.

90 Midfrontal delta/theta activity is attenuated in PD during attentional orienting, conflict,  
91 interval timing, and responses to startling stimuli (Cavanagh et al., 2018; K.-H. Chen et al., 2016;  
92 W. Chen et al., 2018; Güntekin et al., 2020; He et al., 2017; Kelley et al., 2018; Lange et al.,  
93 2016; Parker et al., 2015; Singh et al., 2018, 2021; Solís-Vivanco et al., 2018). Furthermore,  
94 during interval timing, midfrontal ~4-Hz rhythms are coherent with field potentials in the  
95 subthalamic nucleus (STN) (Kelley et al., 2018). Notably, attenuated delta (1-4 Hz) activity  
96 during interval timing is predictive of cognition as measured by the Montreal Cognitive  
97 Assessment (MoCA), suggesting that the recruitment of midfrontal low-frequency oscillations  
98 reflects general cognitive-control processes (Singh et al., 2021). These data lead to the

99 hypothesis that midfrontal ~4 Hz rhythms engage subcortical networks in response to novelty as  
100 a part of an overall system of cognitive control.

101 In the current report, we tested this hypothesis by first comparing midfrontal EEG during an  
102 oddball task between individuals with PD and healthy older adult participants (Andrés et al.,  
103 2006; Courchesne et al., 1975; Escera et al., 1998; Parmentier et al., 2008, 2010). In addition, we  
104 recorded midfrontal EEG and intracranial STN neurons during an intraoperative oddball task in  
105 PD patients undergoing DBS implantation surgery. We report three main findings. First, we  
106 found that 1-4 Hz activity correlated with novelty-related slowing, whereas individuals with PD  
107 had decreased novelty-responsive midfrontal 4-7 Hz rhythms compared to controls. Second, we  
108 found that neurons in the STN were strongly response-modulated rather than cue-modulated, and  
109 most response-modulated STN neurons were influenced by novelty. Third, we found that  
110 midfrontal low-frequency 1-4 Hz oscillations were coherent with response-modulated STN  
111 neurons. These data provide insight into how novel information engages a midfrontal cognitive  
112 control system, and how this system in turn contributes to a frontal-subcortical mechanism for  
113 response control.

114

## 115 **MATERIALS AND METHODS**

### 116 *Participants*

117 This investigation included both an EEG experiment and an intraoperative neurophysiology  
118 experiment. For the EEG experiment, we recruited PD participants and demographically-similar  
119 control participants (see Table 1 for demographics and PD characteristics). PD participants were  
120 recruited through the Movement Disorders clinic at University of Iowa Hospitals and Clinics  
121 (UIHC). Healthy older adults were recruited to serve as control participants from either the

122 Seniors Together in Aging Research (STAR) registry or a list of people who previously  
123 participated in research in our lab and agreed to be contacted for new research opportunities.  
124 Participants were considered healthy if they did not have any neurological and psychological  
125 diseases or disorders. Participants were recruited by email or phone and received compensation  
126 of \$30/hour. All procedures were approved by the University of Iowa (UI) Institutional Review  
127 Board (IRB) (#201707828) and all participants provided informed consent.

128 All participants in the EEG experiment were tested on levodopa as our past work has shown  
129 that levodopa does not reliably modulate midfrontal ~4 Hz rhythms (Singh et al., 2018, 2021).  
130 We performed the Unified Parkinson's Disease Rating Scale (UPDRS) Part 3 during our  
131 experimental sessions while participants were on dopaminergic medication to measure symptom  
132 severity nearest the time of task completion.

133 In parallel with the EEG experiment, we recruited 18 PD patient-volunteers who had elected  
134 to undergo bilateral STN deep brain stimulation (DBS) implantation surgery (see Table 2). These  
135 participants were recruited over a time period of 1.5 years (July 2019–August 2020). Within the  
136 study period there was a 5-month pause in enrollment due to research suspension during the  
137 COVID-19 crisis. Patients were asked during preoperative clinical sessions (1–14 days prior to  
138 surgery) whether they were interested in participating in research during their DBS implantation  
139 surgery. If they agreed, a researcher separate from the surgical team discussed the research  
140 protocols with them, obtained informed consent, and completed a brief practice session of the  
141 task. Participant demographics and PD characteristics are presented in Table 2. Note that these  
142 participants in the intraoperative study were tested off PD medications, as is necessary for the  
143 clinical placement of the deep brain electrodes. All intraoperative research procedures were  
144 approved by the UI IRB (#201402730).

145

146 *Oddball task for EEG experiment*

147 We assessed the response to novelty using a version of the cross-modal oddball distractor task  
148 (Andrés et al., 2006; Escera et al., 1998; Parmentier et al., 2008, 2010; Parmentier & Hebrero,  
149 2013; Wessel & Huber, 2019). This task was presented using the PsychToolbox-3 functions  
150 (Brainard, 1997; Kleiner et al., 2007; Pelli, 1997, <http://psycho toolbox.org/>) in MATLAB 2018b  
151 on either a Linux or Windows computer. Task-specific audio was played through Dell Rev A01  
152 speakers positioned on either side of the monitor. Responses were made with the left and right  
153 index fingers on a standard QWERTY USB-keyboard. In addition to the cross-modal oddball  
154 distractor task, participants completed additional cognitive and motor tasks, as well as detailed  
155 neuropsychological and neuropsychiatric assessments as part of other protocols (Singh et al.,  
156 2018, 2021).

157 Our version of the cross-modal oddball distractor task involved a choice reaction-time task in  
158 which a white arrow appeared in the center of a black screen, and the participant was required to  
159 press the key that corresponded with the direction of the arrow (“q” for left arrow, “p” for right  
160 arrow) as quickly as possible. The appearance of the arrow was preceded by an audio-visual cue  
161 by 500 ms (either the standard cue or the distractor cue). Participants were instructed that this  
162 cue would appear 500 ms before the target stimulus (white arrow), and they were told that the  
163 cue would be a green circle and a short tone (600-Hz sine wave tone lasting 200 ms). The audio-  
164 visual cue was followed by the target arrow (**Figure 1A**). Participants had to respond within 1 s,  
165 after which the fixation cross reappeared and the next trial started after a variable inter-trial  
166 interval between 500–1000 ms.

167

168 Participants completed a brief practice of the task (10 trials), which had all the familiar  
169 standard cues described above. Following the practice, participants completed four blocks of 60  
170 trials each, for a total of 240 trials. Of the 240 trials, 80% contained the standard cues as  
171 described above, 10% contained an unexpected auditory oddball cue (non-repeating, randomly-  
172 created sine wave that sounded like a birdcall or robotic noise lasting 200 ms in duration) in  
173 place of the expected tone, and 10% contained an unexpected visual oddball cue (unique  
174 shape/color combination) in place of the green circle. Because visual stimuli were not presented  
175 during intraoperative research, only auditory oddball trials were analyzed in both datasets.

176

#### 177 *EEG recordings*

178 EEG recordings were performed according to methods described in detail previously (Singh  
179 et al., 2020, 2021). Briefly, we used a 64-channel EEG actiCAP (Brain Products GmbH) with a  
180 0.1-Hz high-pass filter and a sampling frequency of 500 Hz. We used electrode Pz as reference  
181 and electrode FPz as the ground. EEG activity was referenced according to the procedures  
182 described in Singh et al., (2020, 2021). An additional channel was recorded at the mid-inion  
183 region (Iz), and we removed unreliable Fp1, Fp2, FT9, FT10, TP9, and TP10 channels, resulting  
184 in 59 channels for pre- and post-processing. Data were epoched around the cues from -1000 ms  
185 to 2500 ms peri-cue.

186 Bad channels and bad epochs were identified using the FASTER algorithm (Nolan et al.,  
187 2010) and the pop\_rejchan function from EEGLAB, and were then interpolated and rejected  
188 respectively. On average,  $1.6 \pm 0.9$  channels per subject were removed, and Cz was never  
189 removed during preprocessing. Eye blink contaminants were removed following independent  
190 component analysis (ICA).



191 Event-related potentials (ERPs) were low-pass-filtered at 20 Hz for analyses. We calculated  
192 average ERPs for each trial type and each group (PD and control). Our primary interest was in  
193 ~4-Hz midfrontal rhythms; consequently, we utilized time-frequency analyses. After  
194 preprocessing, there was no additional filtering for this analysis. We computed spectral measures  
195 by multiplying the fast Fourier transformed (FFT) power spectrum of single-trial EEG data with  
196 the FFT power spectrum of a set of complex Morlet wavelets (defined as a Gaussian-windowed  
197 complex sine wave:  $e^{i2\pi ft} e^{-t^2/(2\sigma^2)}$ , where  $t$ =time and  $f$ =frequency). Wavelets increased from 1–  
198 50 Hz in 50 logarithmically-spaced steps, which defined the width of each frequency band,  
199 increasing from 3–10 cycles between 1–50 Hz and taking the inverse FFT (Cohen, 2014). The  
200 end result of this process was identical to time-domain signal convolution, and it resulted in  
201 estimates of instantaneous power (the squared magnitude of the analytic signal) and phase angle  
202 (the arctangent of the analytic signal). We then cut the length of each signal accordingly for each  
203 trial (-500 ms to 1000 ms). These short temporal epochs reflect the wavelet-weighted influence  
204 of longer time and frequency periods. Power was normalized by converting to a decibel (dB)  
205 scale ( $10 \cdot \log_{10}(\text{power}_t / \text{power}_{\text{baseline}})$ ), allowing us to directly compare the effects across  
206 frequency bands. The baseline for each frequency was calculated by averaging power from  $\square$ 300  
207 ms to -200 ms prior to cue onset (Singh et al., 2018, 2020, 2021). A 100 ms duration is often  
208 used as an effective baseline since pixel-wise time-frequency data points have already been  
209 resolved over smoothed temporal and frequency dimensions with the wavelets. We took an *a*  
210 *priori* approach focused on channel Cz and delta and theta-band tf-ROIs (300-400ms, delta: 1-4  
211 Hz and theta: 4-7 Hz); these tf-ROIs are strongly justified based on our extensive past work in  
212 cognitive control tasks, EEG, and PD (K.-H. Chen et al., 2016; Kelley et al., 2018; Parker et al.,  
213 2015; Singh et al., 2018, 2020, 2021). Technically, due to the log-scale of the frequency bands,

214 our delta ROI was defined by the frequency bins 1.0233 - 3.9443, and our theta ROI was defined  
215 by the frequency bins 4.2701 – 7.442.

216

### 217 *Oddball task for intraoperative neurophysiology*

218 We used an auditory version of a 3-tone oddball task during intraoperative human  
219 neurophysiology to capture neuronal novelty during DBS-electrode implantation surgeries. Task  
220 design was driven by clinical requirements and the physical experimental set-up in the operating  
221 room. This task is ideal for research for intraoperative patients whose heads are in a stereotaxic  
222 frame during multielectrode recordings because 1) it is in the auditory domain and does not  
223 require a monitor for visual stimuli, 2) it is relatively simple in that it requires a motor response  
224 to sounds, and 3) several trials can be collected in a few minutes. Similar 3-tone designs have  
225 been used previously (Debener et al., 2005), in which novelty is probed with novel tones. All  
226 stimuli were auditory and presented at an appropriate volume through earbuds or external  
227 speaker to be clearly heard over operating room noise. The task and stimuli were presented using  
228 PsychToolbox-3 in MATLAB 2018b on a Windows laptop. Responses were made with a Kinesis  
229 pedal that the patients held in their hands. Participants pressed buttons with their thumbs to  
230 respond.

231 For the 3-tone oddball task, each trial consisted of one of the following sounds being played: a  
232 standard tone that occurred frequently (500 Hz: 50% of trials), a target sound that occurred  
233 infrequently (the word “Go”: 30% of trials; this trial type was used to maintain attention), or a  
234 novel sound (unique birdcall: 20% of trials; **Figure 4A**). Patients were instructed to press with  
235 their left hand (typically thumb) if they heard the word “Go,” and to press with their right  
236 hand/thumb if they heard anything else. We focused our analyses on the standard and the novel

237 tones, as patients responded with their right hand for both the standard tones and the novel  
238 oddball tones, facilitating a direct comparison of novelty induced motor initiation. Patients  
239 practiced the task with 30 trials preoperatively and again on the morning of surgery. The  
240 intraoperative experiment was conducted after the clinically-necessary microelectrode recording  
241 electrodes were confirmed to be in the STN based on clinical recordings.

242

#### 243 *Intraoperative neurophysiology recordings*

244 Bilateral DBS electrodes were implanted sequentially during a single stereotactic procedure.  
245 Participants received short-acting pain relief and sedative medications such as remifentanyl  
246 and/or dexmedetomidine; these were stopped >1 hour prior to the task for participants to be  
247 maximally awake for necessary clinical testing and participation in research. Patients underwent  
248 standard bilateral DBS lead implantations using indirect framed stereotactic STN targeting,  
249 refined by microelectrode recordings from 0.4 to 0.8 mΩ tungsten electrodes (Alpha-Omega,  
250 Inc). Three simultaneous microelectrode recording tracks were used, consisting of anterior,  
251 middle, and posterior trajectories, separated by 2 mm center-to-center from an entry point near  
252 the coronal suture. STN margins were defined by the functional and electrical properties from  
253 these microelectrode recordings, in line with standard clinical practice. Because microelectrode  
254 recordings were clinically necessary, participants were not exposed to extra electrode  
255 penetrations to participate in the study.

256 In addition to STN recordings, scalp EEG was also simultaneously recorded in the operating  
257 room during the oddball task. Prior to the start of surgery, three midfrontal EEG electrodes  
258 (Cadwell Industries, Inc) were placed over frontal locations on the forehead at the hairline with  
259 right and left electrodes approximating F1 and F2 and midfrontal lead approximating Fz (**Figure**

260 **5A**). A reference electrode was placed on the left mastoid. We recorded EEG because this  
261 location indexes midfrontal ~4-Hz rhythms and is in line with prior work (K.-H. Chen et al.,  
262 2016; Kelley et al., 2018; Narayanan et al., 2013; Singh et al., 2021). EEG recordings were  
263 recorded at 24 kHz and subsequently downsampled to 500 Hz. To adjust for the noisy recording  
264 environment of the operating room, the signal was filtered below 50 Hz with a low-pass filter,  
265 followed by a 1-Hz high-pass filter. Microelectrode recordings were sampled at 24 kHz,  
266 amplified, and filtered for single neurons (1–8 kHz) and STN local field potentials (<200 Hz).  
267 Neurophysiological and behavioral data were acquired simultaneously using a Tucker-Davis  
268 Technologies multi-channel data acquisition system.

269 After the experiments, Offline Sorter (Plexon) was used to analyze STN activity and remove  
270 artifacts. Spike activity was analyzed for all cells that fired at rates above 0.1 Hz. Principal  
271 component analysis (PCA) and waveform shape were used for spike sorting. Single units were  
272 defined as those 1) having a consistent waveform shape, 2) being a separable cluster in PCA  
273 space, and 3) having a consistent refractory period of at least 2 ms in interspike interval  
274 histograms. Isolated STN single units were included for analyses if 1) the recording location was  
275 confirmed by the neurosurgeon to be in the STN based on clinically-necessary and observable  
276 STN firing patterns during surgery, and 2) the unit was held throughout the ~6 minute duration  
277 of the task.

278

### 279 *Experimental Design and Statistical Analyses*

280 All data and statistical approaches were reviewed by the UI Biostatistics, Epidemiology, and  
281 Research Design Core at the Institute for Clinical and Translational Science. All code and data  
282 are available at [narayanan.lab.uiowa.edu](http://narayanan.lab.uiowa.edu). For demographic summary statistics, medians and

283 interquartile ranges were calculated for continuous measures. Counts and percentages were  
284 calculated for categorical measures. EEG participant demographics were stratified by group and  
285 gender. Intraoperative participant demographics were stratified by gender. We used the  
286 nonparametric Wilcoxon rank sum test to test for differences in age, education, and MoCA  
287 between strata. We also used a chi-squared test to test for differences in proportion of  
288 male/female and handedness between groups. For behavioral data from the EEG study, we used  
289 a linear mixed-effects model with random intercept for participants' response time to capture the  
290 effects of predictor variables (tone type: standard tones vs novel sounds and group: PD vs  
291 control) on response time. For behavioral data for the intraoperative study, we used the  
292 nonparametric Wilcoxon rank sum test to test for differences between sound stimuli on accuracy  
293 and reaction time. For EEG data, we used linear mixed-effects models with random intercept for  
294 participants' time-frequency power to compare average time-frequency power between groups.  
295 The fixed-effect predictors included group, tone type, MoCA score, and UPDRS Part 3 as  
296 control variables and time-frequency power from the *a priori* regions of interest (ROIs) as the  
297 outcome variables. We set our alpha for these analyses at 0.05. The MoCA score was included in  
298 the model as a covariate given that it was different between groups. UPDRS Part 3 was included  
299 as a covariate for PD participants in order to account for degree of motor impairment. These  
300 analyses were conducted in R.

301 Neuronal modulations were defined via a generalized linear model (GLM) for each neuron,  
302 where the outcome variable was firing rate, and the predictor variable was cue or response,  
303 consistent with past work (Emmons et al., 2019, 2020). For each neuron, we constructed a model  
304 in which the outcome variable was the firing rate binned at 0.1 seconds, and the predictor  
305 variable was either cue or response. Main effects comparisons were made stratified by neuron.

306 Across the ensemble,  $p$  values were corrected via Benjamini-Hochberg false-discovery-rate  
307 (FDR; Benjamini & Yekutieli, 2001), with  $p$  values  $<0.05$  considered significant modulation for  
308 each neuron. We also analyzed neuronal patterns using PCA of peri-event histograms around  
309 response binned at 0.1 second with kernel-density estimates (bandwidth 0.25). Finally, we  
310 analyzed midfrontal EEG-STN coherence with the Neurospec 2.0 coherence toolbox  
311 (<https://www.neurospec.org/>) using the `sp2a_m1` function with a segment power of 9 and a  
312 window size of 250 ms (Rosenberg et al., 1989). We have used this toolbox extensively in the  
313 past to examine spike-field coherence within and across brain networks (Kelley et al., 2018;  
314 Kingyon et al., 2015; Narayanan et al., 2013; Parker et al., 2014). We used delta and theta ROIs  
315 comparable to the EEG study (delta: 1-4 Hz, theta 4-7 Hz) to test whether delta/theta-band  
316 activity was coherent with spiking activity in response-modulated and non-response-modulated  
317 neurons. To compare coherence across neurons with different spike rates and trial numbers,  
318 spike-field coherence was scaled such that the raw spike-field coherence of each neuron was  
319 divided by the 95% confidence interval for each neuron. According to this metric, a “1”  
320 represents coherence at the 95% confidence interval. These analyses were performed in  
321 MATLAB.

322

## 323 **RESULTS**

### 324 *Demographics*

325 Table 1 shows demographics for the EEG study and Table 2 shows demographics for the  
326 intraoperative study. Analysis for the EEG study was conducted with 50 individuals with PD  
327 and 35 control participants. We collected data from similar numbers in each group, but we  
328 experienced technical issues that caused the exclusion of data for a subset of participants. For  
329 EEG participants, demographic results were stratified by group and gender. Wilcoxon test results

330 showed that the groups were not significantly different in terms of age ( $p=0.19$ , effect size  
331  $r=0.14$ ) or years of education ( $p=0.10$ , effect size  $r=0.18$ ). The MoCA score was higher for the  
332 control participants compared to PD participants ( $p<0.001$ , effect size  $r=0.38$ ), thus we  
333 accounted for MoCA in our analyses.

334

335 *PD participants had slowed reaction-times during novelty-related distraction*

336 We studied how novelty engaged cortical cognitive control mechanisms by recording EEG  
337 during the cross-modal oddball distractor task (**Figure 1**). This task asked participants to respond  
338 to a target cue (arrow) following either a familiar stimulus (600-Hz tone) or a novel stimulus  
339 consisting of complex and unique auditory features.

340 Response accuracy was high overall (Median (1<sup>st</sup> Quartile–3<sup>rd</sup> Quartile); Control: standard  
341 99.5% (99.5%-100.0%), novel 100.0% (100.0%-100.0%); PD: standard 98.2% (93.4%-99.5%),  
342 novel 97.9% (91.7%-100%)), although control participants were significantly more accurate than  
343 PD participants (main effect of group:  $F_{(1,83)}=15.3$ ,  $p<0.001$ ). There was no main effect of sound  
344 type on accuracy ( $F_{(1,83)}=0.52$ ,  $p=0.47$ ), and no interaction between group and sound type on  
345 accuracy ( $F_{(1,83)}=2.3$ ,  $p=0.13$ ).

346 Regarding response speed, our model revealed a significant interaction between the effects of  
347 group and sound type on reaction time ( $F_{(1,83)}=7.3$ ,  $p<0.01$ ), such that PD participants were  
348 disproportionately more affected by sound type than control participants. On trials with a  
349 distracting novel sound, control participants responded approximately as quickly as on trials with  
350 a standard tone (Median (1<sup>st</sup> Quartile–3<sup>rd</sup> Quartile); Control: novel 454 ms (427-527), standard  
351 454 ms (416-508 ms)), whereas PD participants responded more slowly compared to trials with a  
352 standard tone (PD: novel 505 ms (439-571 ms), standard 462 ms (416-515 ms); **Figure 1B**).

353 There was a significant main effect of sound type ( $F_{(1,83)}=31.7$ ,  $p<0.001$ ), which appears to be  
354 driven by the effect within the PD group. There was no significant effect of group (Control vs.  
355 PD) on reaction time ( $F_{(1,83)}=1.7$ ,  $p=0.20$ ). Post-hoc analyses revealed that within the PD group,  
356 there was a significant difference between reaction times for the sound types ( $t(83.0)=-6.5$ ,  
357  $p<0.0001$ ). There was also a significant difference in reaction time between controls on standard  
358 tones and PD participants on novel sounds ( $t(98.1)=-2.8$ ,  $p=0.03$ ). No other post hoc contrast was  
359 significant. As expected, controls and PD participants both showed significant effects of block  
360 on novelty-related slowing (control:  $F_{(1,102)}=6.3$ ,  $p=0.01$ ; PD:  $F_{(1,147)}=19.9$ ,  $p<0.001$ ). Both  
361 groups had greater novelty-related slowing in Block 1 compared to Blocks 2, 3, and 4.

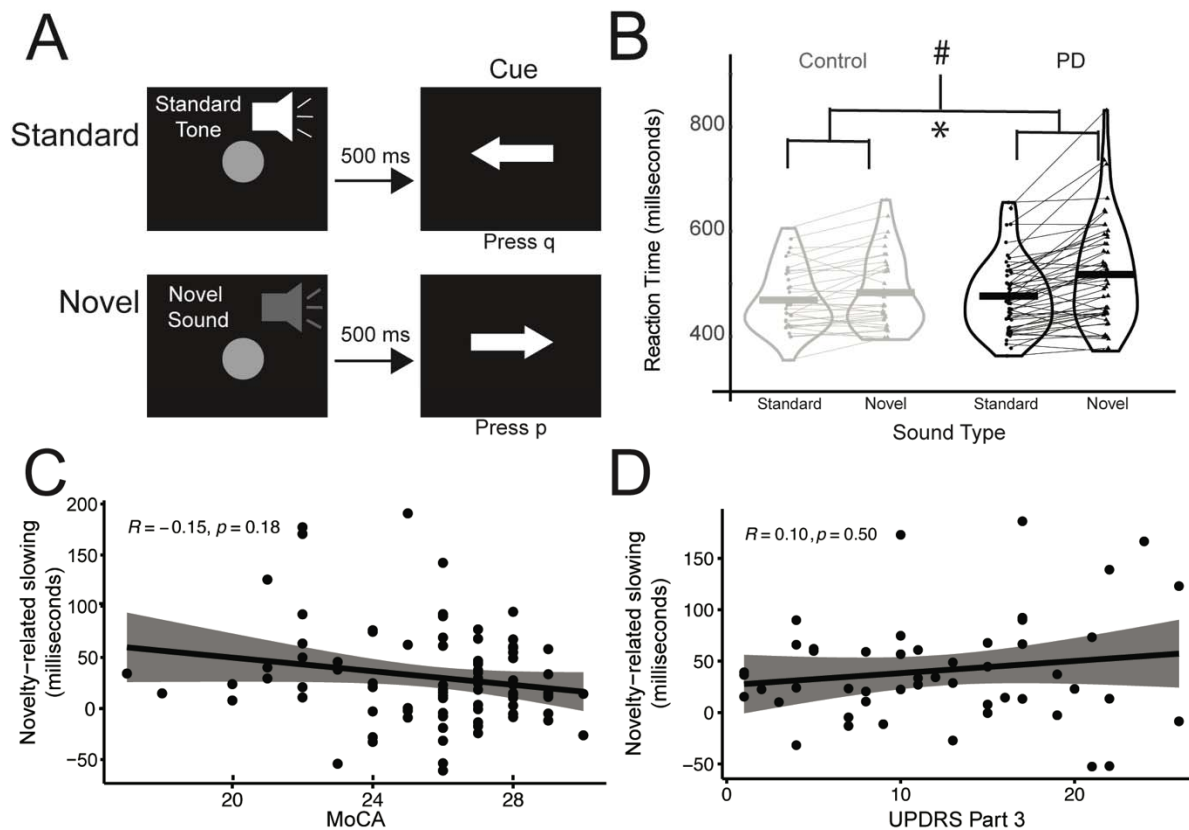

362  
363 **Figure 1. Novelty slows responses more for PD participants than controls.** A) The cross-modal oddball  
364 distractor task consisted of trials with an arrow preceded by either a standard tone (80% of trials) or a



365 *novel sound (10%; of note, 10% of trials used a novel visual stimulus; these trials were not analyzed).*  
366 *The arrow required a left “p” or right “q” key press, based on the direction. B) Reaction time for*  
367 *Control and PD participants; each dot represents an individual’s median RT and the thick horizontal bar*  
368 *represents group medians. Novel oddball stimuli disproportionately distracted PD participants.*  
369 *Compared to Control participants, PD participants responded more slowly to the arrow on trials when a*  
370 *novel sound was presented relative to a standard tone. \* indicates a significant main effect of sound type*  
371 *(standard vs. novel) on reaction time. # indicates a significant interaction between sound type and group*  
372 *(control vs. PD) on reaction time via a linear mixed-effects model. C) Cognitive function as measured by*  
373 *the Montreal Cognitive Assessment (MoCA) did not significantly correlate with novelty-related slowing.*  
374 *D) UPDRS Part 3 did not significantly correlate with novelty-related slowing in PD participants.*

375 Finally, we found that novelty-related slowing was not related to cognitive function, as  
376 measured by MoCA (Spearman  $\rho=-0.15$ ,  $p=0.18$ ; **Figure 1C**), or motor function, as measured by  
377 UPDRS Part 3 in PD participants (Spearman  $\rho=0.10$ ,  $p=0.50$ ; **Figure 1D**). Taken together, these  
378 data suggest that PD participants were more distracted by novel stimuli than controls.

379  
380 *PD participants had attenuated ~4-Hz midfrontal rhythms*

381 Next, we examined cortical correlates of cognitive control in response to novelty. We found  
382 that ERPs were differentiated between controls and PD participants for standard tone trials  
383 (**Figure 2A, top panel**) and novel sound trials (**Figure 2A, bottom panel**). The possibility of an  
384 underlying low-frequency contribution across the entire ERP in PD participants suggests that  
385 time-frequency analysis might be more effective in isolating unique temporal events that differ  
386 between groups.

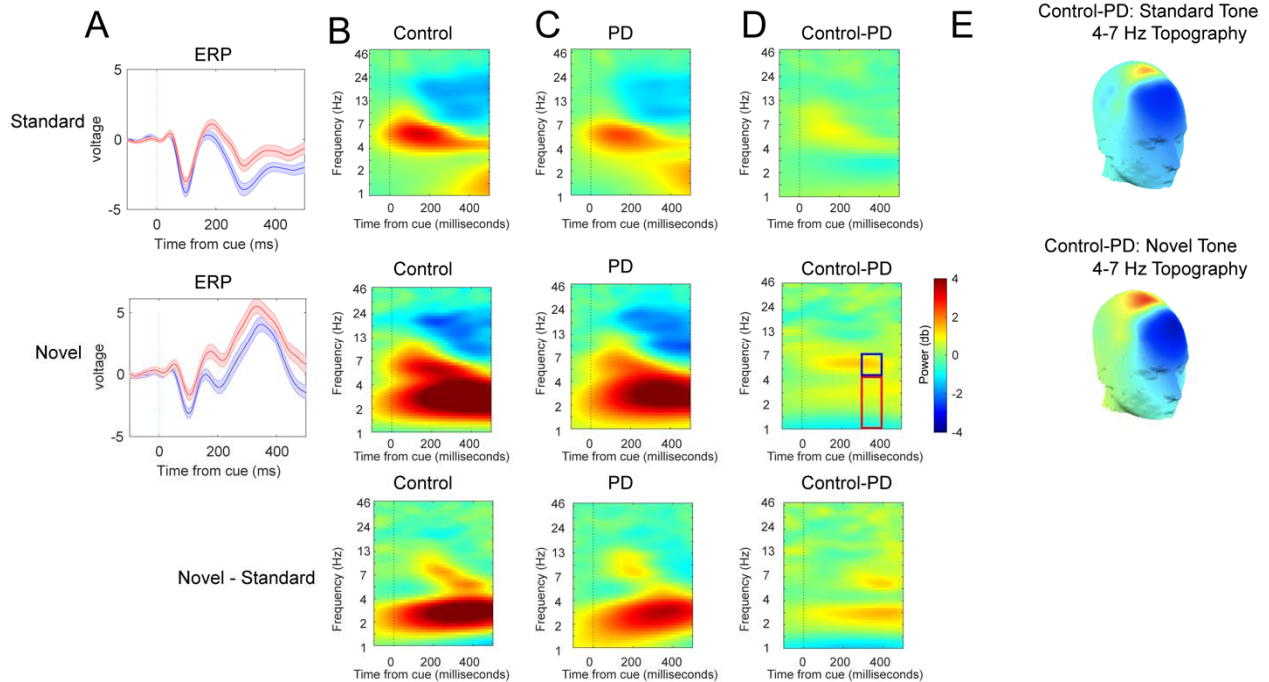

387

388 **Figure 2. Novelty boosts midfrontal ~4-Hz power, which is attenuated in PD.** A) Average event-related  
 389 potentials for trials with standard tones (top row) and novel tones (bottom row) for controls (blue line)  
 390 and PD participants (red line). B) Time-frequency power spectrograms for standard tones (top panels),  
 391 novel sounds (middle panels), and novel – standard (bottom panels) for Control and C) PD, and D)  
 392 Subtraction of Control – PD. The red box in D (middle panel) represents the delta band region-of-interest  
 393 (ROI) (1-4), while the blue box represents the theta band ROI (4-7 Hz) 300-400 ms after the cue. E)  
 394 Topographical representation of the comparison of theta power between controls and PD participants  
 395 (Control – PD) for standard tones (top panel) and novel sounds (middle panel). Data from 50 PD and 35  
 396 control participants.

397 We examined power from *a priori* tf-ROIs (delta: 1-4 Hz and theta: 4-7 Hz for 300-400 ms  
 398 post-tones; blue and red boxes in **Figure 2D**). For our delta ROI, we found no interaction  
 399 between group and sound type ( $F(1,83)=0.88, p=0.35$ ) and no main effect of group ( $F(1,81)=0.02,$   
 400  $p=0.89$ ; **Figure 3A**). Our linear mixed-effects model did reveal a significant effect of sound type  
 401 ( $F(1,83)=166.29, p<0.0001$ ), such that delta power was higher for novel sound trials compared to

402 standard tone trials. There were no significant effects of MOCA or UPDRS Part 3. For theta,  
403 there was a significant interaction between sound type and group ( $F(1,83)=6.6, p=0.01$ ; **Figure**  
404 **3B**), such that controls had higher power in this ROI during trials with a novel sound compared  
405 to a standard tone, whereas PD participants did not have as large of a difference between sound  
406 types. Similar to delta, our model revealed a significant main effect of sound type on this tf-ROI  
407 ( $F(1,83)=47.91, p<0.001$ ), with novel sound trials showing higher theta power. There were no  
408 significant main effects of group ( $F(1,81)=0.61, p=0.44$ ), MoCA, or UPDRS Part 3.

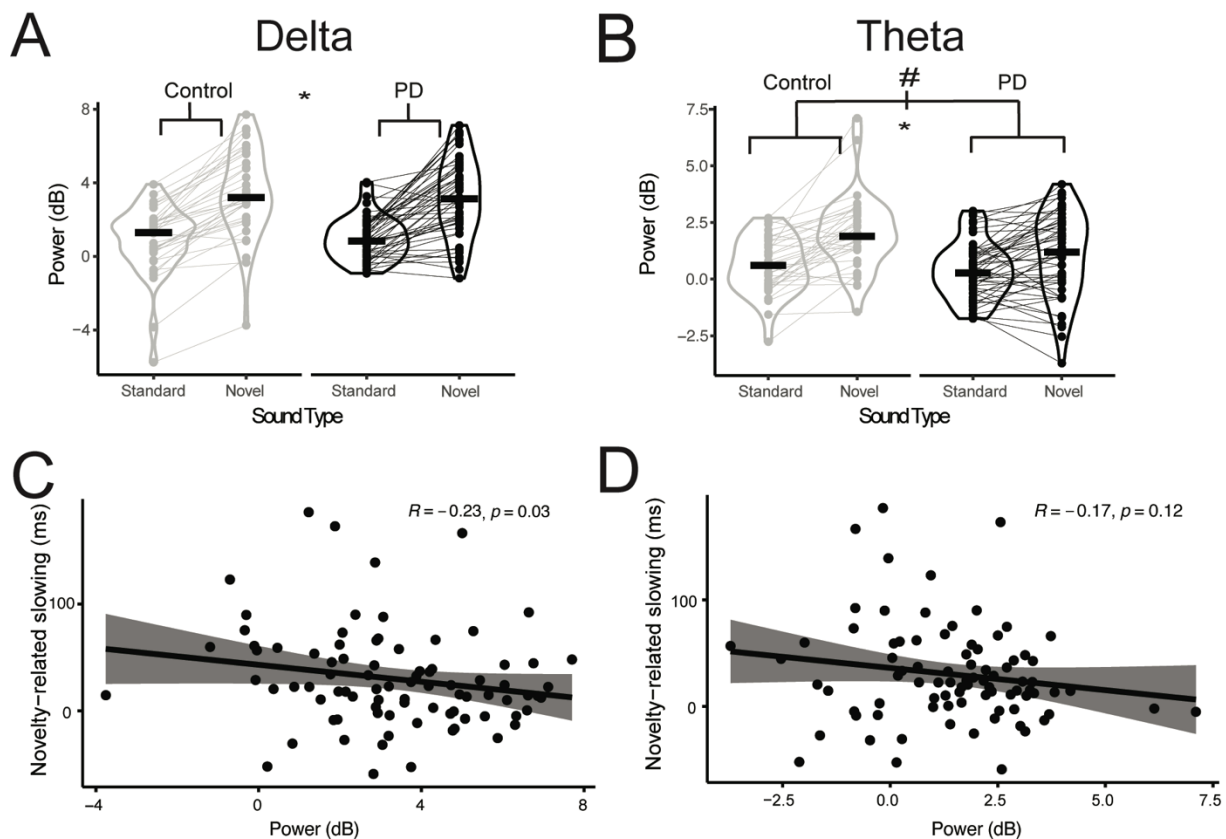

409  
410 **Figure 3. 1-4 Hz delta rhythms are linked with novelty-related slowing, and 4-7 Hz theta rhythms are**  
411 **attenuated in PD.** A) Power in a priori delta tf-ROI (1-4 Hz; 300-400 ms after cue) for Control and PD  
412 participants; each dot represents an individual's mean power and the thick horizontal bars represent  
413 group medians. A linear mixed-effects model revealed a significant main effect of sound type (novel vs.

414 *standard), denoted by \*. B) Power in a priori theta tf-ROI (4-7 Hz; 300-400 ms after cue) for Control and*  
415 *PD participants. A linear mixed-effects model revealed a significant interaction between sound type and*  
416 *group on power in this ROI, denoted by #, and a significant main effect of sound type (novel vs.*  
417 *standard), denoted by \*. Compared to control participants, PD participants experienced a smaller*  
418 *increase in theta power on trials when a novel sound was presented relative to a standard tone. C) For*  
419 *the delta tf-ROI, there was a significant relationship between novelty-related slowing and delta power*  
420 *across all participants; but D) for the theta tf-ROI, this relationship did not achieve significance. Data*  
421 *from 85 participants (35 Control and 50 PD).*

422 We found a significant relationship between midfrontal 1-4 Hz power and novelty-related  
423 slowing (Spearman  $\rho=-0.23$ ,  $p=0.03$ ; **Figure 3C**). However this relationship with behavior was  
424 not significant for midfrontal 4-7 Hz power (Spearman  $\rho=-0.17$ ,  $p=0.12$ ; **Figure 3D**). Finally,  
425 delta power on novel trials did not correlate significantly with MOCA (Spearman  $\rho=0.08$ ,  
426  $p=0.43$ ) or UPDRS Part 3 (for PD group only; Spearman  $\rho=-0.04$ ,  $p=0.78$ ). Similarly, 4-7 Hz  
427 power also did not correlate significantly with MoCA (Spearman  $\rho=0.12$ ,  $p=0.28$ ) or UPDRS  
428 Part 3 (for PD group only; Spearman  $\rho=-0.23$ ,  $p=0.11$ ). These data are convergent with past  
429 work showing that 1-4 Hz rhythms are linked with response control (Singh et al., 2021) whereas  
430 4-7 Hz rhythms are attenuated in PD (Güntekin et al., 2020; He et al., 2017; Iyer et al., 2020;  
431 Kelley et al., 2018; Parker et al., 2015; Singh et al., 2018, 2021; Soikkeli et al., 1991).

432

433 *Human single STN neurons were modulated around responses to novelty*

434 To investigate the cortico-striatal pathways underling novelty-modulated responses, we  
435 leveraged intraoperative neurophysiology to record from single STN neurons. Participants  
436 performed the task with a median accuracy of 87% (Q1-Q3: 82%-92%); there was no difference

437 in median accuracy or reaction time between tone types (accuracy: standard 86% (77%-93%),  
438 novel 90% (80%-95%),  $p=0.21$ , effect size  $r=0.71$ ; reaction time: standard 877 ms (721-1024  
439 ms), novel 875 ms (761-936 ms),  $p=0.99$ , effect size  $r=0.71$ ; **Figure 4B**).

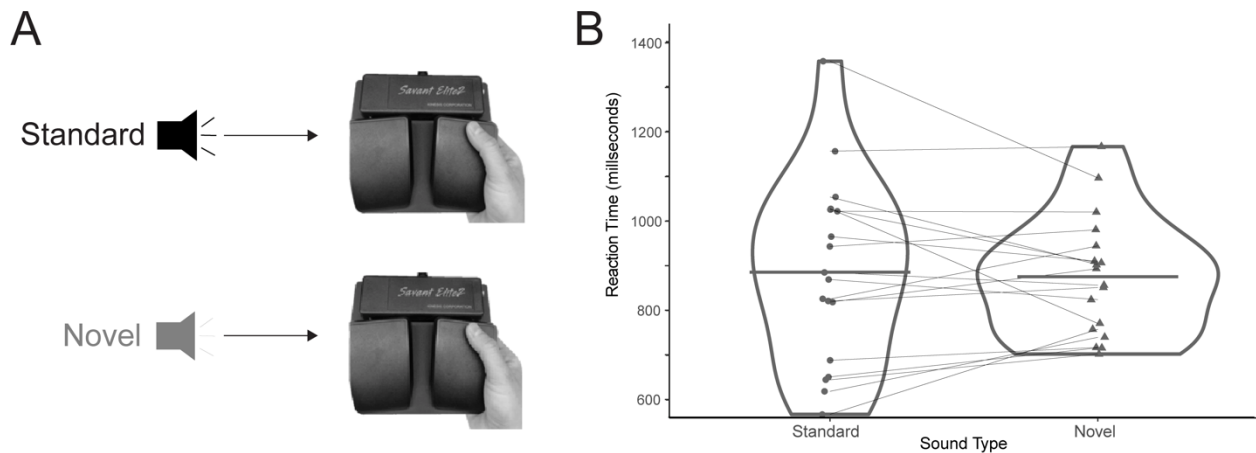

440  
441 **Figure 4. Intraoperative recordings of novelty-related responses.** A) Auditory 3-tone oddball task  
442 performed by patients with PD in operating room during deep brain stimulation surgery. Patients  
443 responded to standard tones (50% of trials) and novel sounds (20% of trials) with a right-hand response  
444 using a hand-held Kinesis pedal; an additional trial type with a constant stimulus required a left response  
445 and was not analyzed. B) Reaction times for standard tones and novel oddball sounds; each dot  
446 represents individual median reaction times, and thicker horizontal lines represent group median  
447 reaction times. No significant differences for reaction times between groups were found. Data from 18  
448 PD patient-volunteers during intraoperative neurophysiology.

449 With these 18 participants, we also performed intraoperative scalp EEG (**Figure 5A**).  
450 Although these recording locations were anterior to the midfrontal areas which showed peak 1-7  
451 Hz activity in the EEG experiment outside the operating room (i.e. **Figure 2**), we were able to  
452 capture midfrontal cue-related activity from the intraoperative participants (**Figure 5B-C**).

453

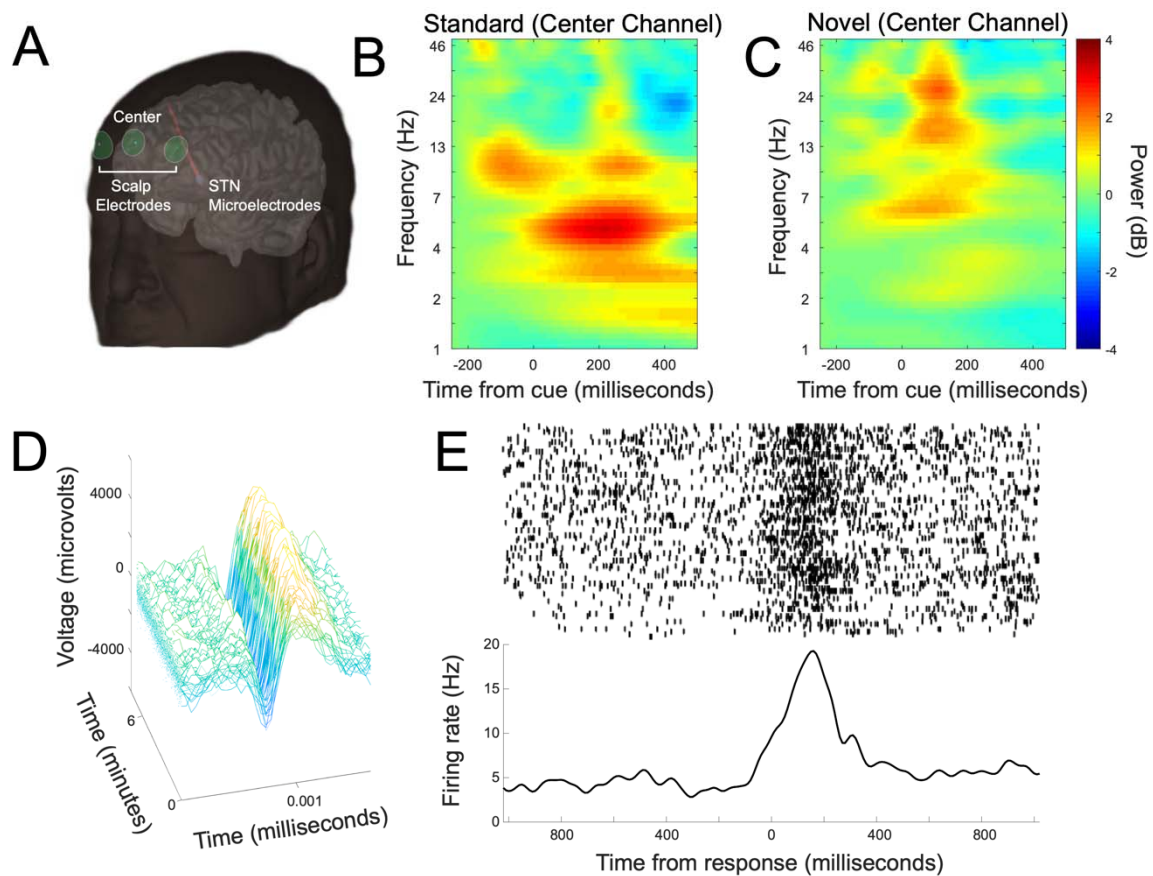

454

455 **Figure 5. Recording simultaneously from frontal lobe and STN during surgery.** A) Schematic of  
456 surgical recording with three frontal scalp-based electrodes (center, right, and left channels), and STN  
457 microelectrode recordings. B) Time-frequency plots of activity from the center channel for standard and  
458 novel tones in the auditory 3-tone oddball task. Data from 18 PD patient-volunteers undergoing DBS  
459 implantation surgery. D) Waveforms from a single STN neuron indicating that neuronal waveforms of  
460 voltage vs. time were stable over ~6 minutes. E) Response-locked peri-event raster of neuronal firing  
461 from an exemplar neuron; the top panel is a peri-response raster, with each row representing one trial  
462 and each tick representing an action potential. The bottom panel represents a peri-event histogram of  
463 firing rate around all responses.

464 We identified 54 well-isolated STN neurons from 17 of the 18 participants (one did not have  
465 STN neuronal recordings; **Figure 5D-E**). We defined modulations via neuron-by-neuron GLMs  
466 of firing rate vs. all cues and responses at a trial-by-trial level. We found that 5 of the 54 neurons  
467 (9%) were significantly modulated around the cue. By contrast, we found significantly more  
468 neurons (17 of 54, 32%) with response-related activity ( $\chi^2=8.2$ ;  $p=0.004$ ; **Figure 5E & Figure**  
469 **6A–B**). To further characterize the patterns of neuronal activity, we utilized PCA, a proven data-  
470 driven technique, to characterize neuronal activity (Chapin & Nicolelis, 1999; Narayanan &  
471 Laubach, 2009). We found that the first component (principal component 1; PC1) explained  
472 38.5% of variance and appeared to be modulated around response; PC2 explained 28.5% of  
473 variance and was modulated prior to response (**Figure 6C-D**). These results provide evidence  
474 that STN neurons were strongly response modulated.



475

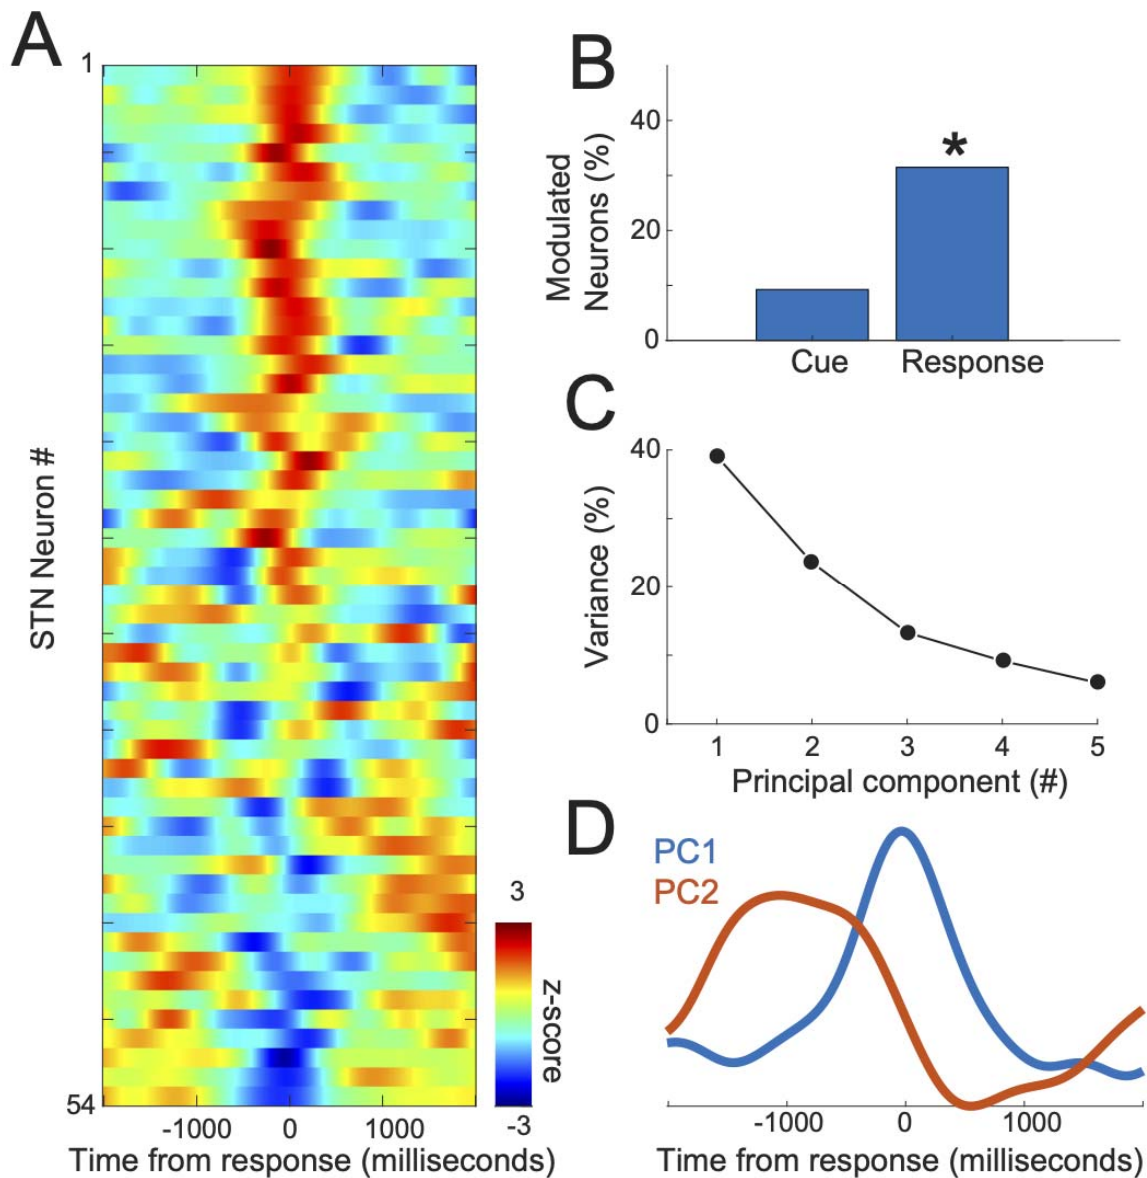

476

477 **Figure 6. STN neurons had prominent response modulations.** A) Average z-scored activity of all 54  
478 STN neurons around responses. B) Trial-by-trial generalized linear models of firing rate vs. cue and  
479 response revealed that STN neurons were more strongly modulated by response than cue; \*indicates  
480 significance via a  $\chi^2$  test. C) Principal component analysis (PCA), a data-driven approach to identify  
481 neuronal patterns across an ensemble, revealed that principal components 1 and 2 (PC1 and PC2)



482 explained 64% of variance among STN ensembles. D) PC1 and PC2 were modulated around response.

483 Data from 54 STN neurons in 17 PD patient-volunteers.

484 Next, we were interested in how response-related activity was modulated by novel cues.

485 Strikingly, we found that nearly all (16 of 17; 94%; **Figure 7B**) response-related neurons had

486 differential activity with novel cues as quantified by an FDR-corrected neuron-by-neuron GLM

487 of event type on response-related activity. Thus, these data indicate that nearly all STN response-

488 related activity was modulated by novelty.

489

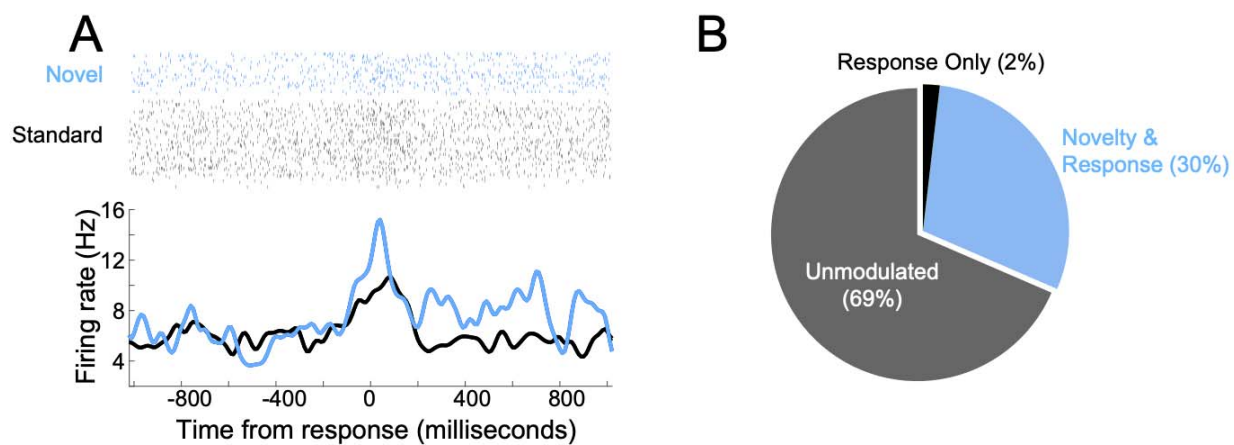

490

491 **Figure 7. Most response-related neurons in the subthalamic nucleus were modulated by novelty.** A)

492 Example raster of neuronal spiking from one novelty-modulated neuron. B) We recorded from 54 STN

493 neurons. Of these, 17 STN neurons had response-modulations. 16 were modulated by novelty and

494 response (30% of the total), and 1 was modulated by response only (2% of the total). Data recorded in 17

495 patient-volunteers.

496 Response-related STN neurons showed low-frequency coherence with midfrontal EEG

497 Finally, we were interested in the relationship between STN neuronal activity with scalp  
498 EEG-related modulations. We examined spike-field coherence, through which we could link the  
499 activity of midfrontal scalp electrodes to STN spiking (Kim & Narayanan, 2019; Narayanan et  
500 al., 2013; Parker et al., 2014, 2015). For some STN neurons, we noticed that spikes fired in-  
501 phase with low-frequency scalp EEG activity (**Figure 8A**). Among response-related STN  
502 neurons, there was significant low-frequency spike-field scalp-STN coherence after the cue  
503 around the time of responses (**Figure 8B**). Around responses, low-frequency delta coherence was  
504 stronger for response-related neurons compared to non-response-related neurons (**Figure 8C vs**  
505 **8B**; scaled spike-field coherence for response neurons: 0.6(0.4-1.5) vs. non-response neurons  
506 0.3(0.2-0.6); Wilcoxon rank sum  $p=0.037$ ; effect size Cohen's  $D=0.9$ ). This spike-field  
507 coherence relationship did not exist for theta (z-scaled coherence for response neurons: 0.5(0.2-  
508 0.7) vs. non-response neurons 0.4(0.3-0.4); Wilcoxon rank sum  $p=0.29$ ; effect size Cohen's  
509  $D=0.2$ ). These data provide evidence that STN response-related activity could reflect frontal top-  
510 down novelty-induced orienting and control. Together, these data support the idea that novelty  
511 can trigger midfrontal low-frequency rhythms, which in turn engage subcortical STN circuits  
512 involved in response control.

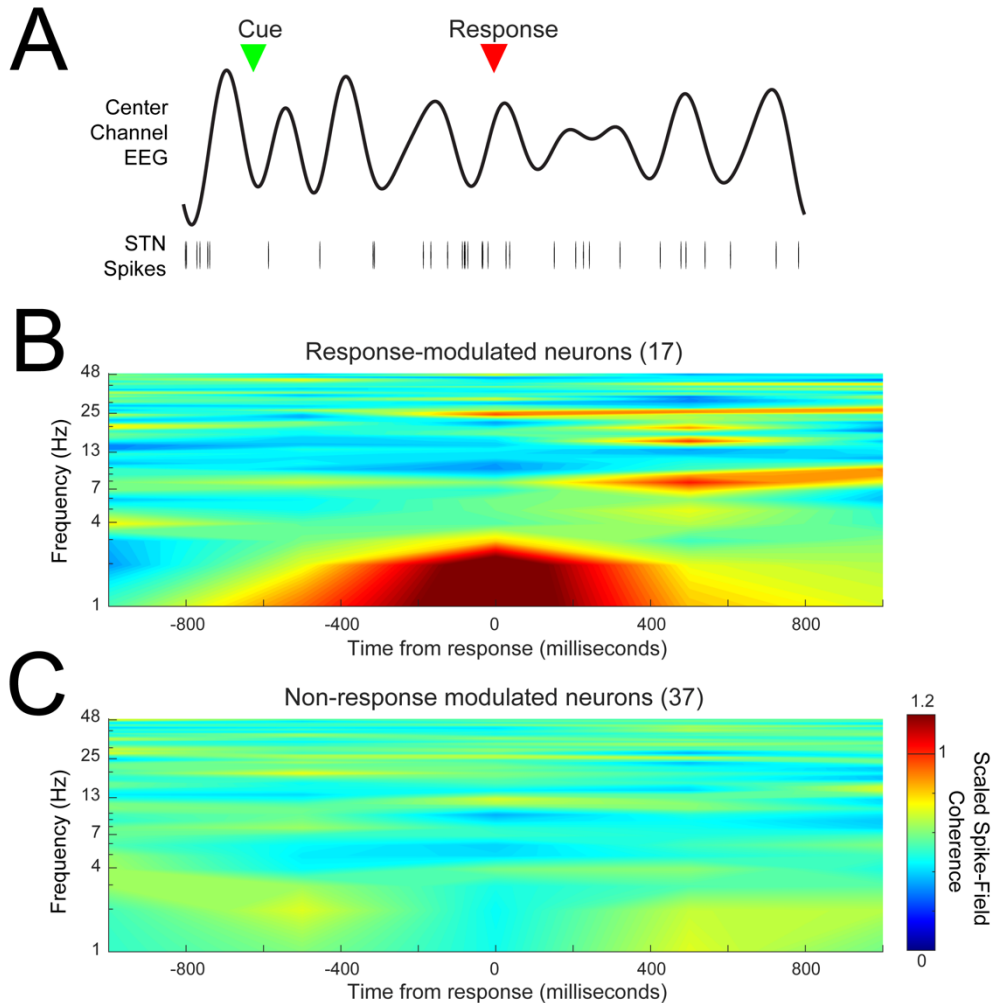

513

514 **Figure 8. Response-related STN neurons had low frequency coherence with frontal EEG.** A) An  
515 example time series from a single trial of center channel EEG and STN spiking activity; cue is denoted  
516 via a green triangle, and response is denoted via a red triangle. This neuron becomes coherent  
517 immediately with midfrontal low-frequency oscillations after the cue and prior to response. B) Across all  
518 17 response-modulated STN neurons, there was significantly more 1-4Hz spike-field coherence with  
519 center-channel EEG electrodes than for C) 37 non-response modulated STN neurons. Spike-field  
520 coherence is scaled with 1 representing the 95% confidence-interval for coherence for comparison across  
521 neurons. Data from 54 STN neurons in 17 PD patient-volunteers.

522

523 **DISCUSSION**

524 In this study, we combined scalp-based EEG and intraoperative recordings to examine  
525 novelty-related brain activity in frontal-subcortical circuits. We report three main results: 1) Both  
526 PD and control participants engaged low-frequency power in response to novel stimuli, with 1-4  
527 Hz activity linked to novelty-related slowing whereas 4-7 Hz activity was specifically attenuated  
528 in PD participants, 2) STN neurons were modulated by novel responses, and 3) STN response-  
529 related neurons exhibited low-frequency coherence with midfrontal EEG activity. Our findings  
530 provide a mechanistic depiction of midfrontal-STN cognitive control systems in PD and neuronal  
531 responses to novel information. Taken together, our data support the idea that midfrontal low-  
532 frequency rhythms recruit subthalamic resources to slow, orient, and respond to new  
533 information.

534 Our work here is in line with past studies from our group and others showing that PD  
535 participants have attenuated midfrontal delta/theta rhythms between 1-7 Hz (Cavanagh et al.,  
536 2018; K.-H. Chen et al., 2016; Giller et al., 2020; Singh et al., 2018, 2021; Solís-Vivanco et al.,  
537 2018). This line of work includes data from the Simon reaction-time task (Singh et al., 2018),  
538 interval timing tasks (Singh et al., 2021), and working memory manipulations (Itthipuripat et al.,  
539 2013). Our past work has found that midfrontal delta 1-4 Hz frequencies are attenuated in PD  
540 (Kim et al., 2017; Parker et al., 2015) and correlated with cognitive function and behavior during  
541 an interval timing task (Singh et al., 2021). In this present study, we find that these rhythms are  
542 linked with novelty-related slowing and engaged with subcortical STN neurons, but not  
543 specifically attenuated in PD. By contrast, we found that novelty-triggered midfrontal 4-7 Hz  
544 oscillations were attenuated in PD participants, and not reliably linked with novelty-related  
545 slowing, although we note that the relationship is in the same direction, and it is possible with  
546 more statistical power this relationship would be more consistent. Of note, there are multiple

547 generators of mid-frontal low-frequency activity (Zuure et al., 2020), and it is possible that lower  
548 frequencies (1-4 Hz) are more consistently engaged by novelty-related slowing (Cavanagh et al.,  
549 2018; Lavallee et al., 2014; Parker et al., 2015; Wessel et al., 2016) while higher frequencies (4-7  
550 Hz) may be more reliably impaired in PD (Cavanagh & Frank, 2014; Cohen & Donner, 2013;  
551 Singh et al., 2018; Töllner et al., 2017; Zuure et al., 2020).

552 We found that response-modulated STN neuronal activity was coherent with these lower  
553 frequencies (1-4 Hz). Our work is consistent with prior studies of STN neural activity; indeed,  
554 Bockova and colleagues (2011) found that the STN was modulated by distractor stimuli with a  
555 positive ERP peak around 200 ms, and Brittain and colleagues (2012) found that response  
556 inhibition is associated with STN activity (see also Alegre et al., 2013), which serves to suppress  
557 motor-related output from the basal ganglia. The low-frequency coherence we found is  
558 consistent with recent studies that revealed that oscillations in the STN during conflict are driven  
559 by midfrontal activity up to 7 Hz (Cavanagh et al., 2011, 2017; Zavala et al., 2014; Zeng et al.,  
560 2021). It is possible that multiple cortical 4-7 Hz theta features could couple with lower-  
561 frequency (~2 Hz) STN oscillations engaging novelty. This could suggest that the cortex has  
562 more sophisticated information integration whereas the STN could more simply carry out  
563 reactive responses to novelty (e.g. stop & orient). Multiple studies have indirectly demonstrated  
564 connectivity between the frontal cortex and the STN in a pathway known as the hyperdirect  
565 pathway (Brunenberg et al., 2012; W. Chen et al., 2020; Haynes & Haber, 2013; Kelley et al.,  
566 2018), and midfrontal-STN activity may interact either directly via hyperdirect or via other key  
567 structures (such as the the thalamus) that are part of canonical basal ganglia circuits.

568 Our data help us understand how PD impacts novelty-related responses. Previous studies have  
569 shown that individuals with PD present with impaired habituation over repeated stimulus

570 presentations, and that attenuated midfrontal theta activity is related to the rate of startle  
571 habituation (Cavanagh et al., 2018; K.H. Chen et al., 2016). Importantly, EEG habituation to  
572 novelty can effectively classify PD patients (Cavanagh et al., 2018). In our study, PD participants  
573 were not as successful as controls at quickly reorienting to the task at hand when presented with  
574 distracting novel stimuli, though we note that both controls and PD participants experienced an  
575 expected decrease in novelty-related slowing across the task. We found that PD participants also  
576 demonstrated reduced novelty-related frontal theta oscillations compared to controls (although  
577 theta power, unlike delta power, was not directly related to behavioral response speed). These  
578 findings suggest that structural and functional changes related to PD affect the circuitry that  
579 evaluates and responds to novel stimuli.

580 Our work has several limitations. First, intraoperative recordings present many challenges,  
581 including a lack of control over the experimental environment. In particular, intraoperative  
582 conditions are quite different from scalp EEG sessions; in addition, we used adhesive electrodes  
583 placed somewhat anterior to the peak of midfrontal ~4-Hz activity our whole scalp EEG  
584 experiment captured (i.e. **Figure 2E**). These factors may have affected our novelty-related  
585 findings in **Figure 4C**. Because STN single-unit recordings occur in PD patients, it is unclear  
586 how our STN findings generalize to non-PD patients or patients with other brain diseases that  
587 disrupt frontostriatal circuits.

588 Overall, we found evidence for a ~4-Hz stimulus-response arc between the frontal cortex and  
589 STN during novelty. Our findings align with recent work demonstrating clinical relevance of  
590 midfrontal ~4-Hz activity in PD (Singh et al., 2021; Solís-Vivanco et al., 2018). Further, small  
591 studies have revealed that STN low-frequency (~4–5 Hz) stimulation can beneficially impact  
592 conflict (Scangos et al., 2017) and interval timing (Kelley et al., 2018), as well as oscillatory

593 activity in the prefrontal cortex (Bentley et al., 2020). These findings in humans are further  
594 supported by evidence from animal models of PD showing that highly-specific low-frequency  
595 stimulation can improve interval timing (Kim et al., 2017; Kim & Narayanan, 2019). Restoring  
596 behaviorally-relevant ~4-Hz oscillations may contribute directly to improved cognitive  
597 performance. Future research should systematically evaluate this mechanism in humans.

598 Overall, the current studies show that novelty-related distraction is more evident in  
599 individuals with PD compared to controls. We find that that low-frequency delta power is related  
600 to novelty-related slowing and individuals with PD had decreased novelty-responsive midfrontal  
601 4-7 Hz rhythms compared to controls. Furthermore, we find that neurons in the STN are  
602 modulated around responses to novelty, and that neurons in the STN and the midfrontal cortex  
603 have low-frequency coherence around responses to novelty. Our data illuminate how novelty  
604 modulates ~4-Hz rhythms in frontal-STN circuits, which may provide insight into neuronal  
605 responses to novelty and PD-related changes in cognitive control. This work may be significant  
606 in the development of novel biomarkers or treatments for PD and other brain diseases degrading  
607 basal ganglia circuits.

608

609 **Contributions**

610 RC, NN, JFC, and JG conceived and designed experiments; RC and AE recorded EEG data; RC  
611 and JG performed intraoperative recordings; AS, RC, JFC, and NN wrote analysis code; RC,  
612 JFC, NN, and JG wrote the paper; and JB independently checked the data.

613 **Funding**

614 This work was supported by the National Institute of Neurological Disorders and Stroke (grant  
615 number R01 NS100849-01A1 to NN/JG/JFC) and the National Institute on Aging (grant number  
616 F32 AG069445-01 to RC) at the National Institutes of Health. This work was also supported in  
617 part by the University of Iowa Institute for Clinical and Translational Science, which is granted  
618 with Clinical and Translational Science Award funds from the National Institutes of Health  
619 (grant number UL1TR002537).

620 **Acknowledgements**

621 We would like to acknowledge Haiming Chen, Youngcho Kim, Derrick Okine, Darcy Diesberg,  
622 and Tobin Dykstra for technical contributions and helpful discussions.

623 **Corresponding Author:**

624 Nandakumar Narayanan  
625 169 Newton Road  
626 Pappajohn Biomedical Discovery Building—5336  
627 University of Iowa, Iowa City, 52242  
628 319-353-5698

629

630



631 **References**

- 632 Alegre, M., Lopez-Azcarate, J., Obeso, I., Wilkinson, L., Rodriguez-Oroz, M. C., Valencia, M.,  
633 Garcia-Garcia, D., Guridi, J., Artieda, J., Jahanshahi, M., & Obeso, J. A. (2013). The  
634 subthalamic nucleus is involved in successful inhibition in the stop-signal task: A local field  
635 potential study in Parkinson's disease. *Experimental Neurology*, 239(1), 1–12.  
636 <https://doi.org/10.1016/j.expneurol.2012.08.027>
- 637 Andrés, P., Parmentier, F. B. R., & Escera, C. (2006). The effect of age on involuntary capture of  
638 attention by irrelevant sounds: A test of the frontal hypothesis of aging. *Neuropsychologia*,  
639 44(12), 2564–2568. <https://doi.org/10.1016/j.neuropsychologia.2006.05.005>
- 640 Benjamini, Y., & Yekutieli, D. (2001). The Control of the False Discovery Rate in Multiple  
641 Testing under Dependency. *The Annals of Statistics*, 29(4), 1165–1188.  
642 <https://www.jstor.org/stable/2674075>
- 643 Bentley, J. N., Irwin, Z. T., Black, S. D., Roach, M. L., Vaden, R. J., Gonzalez, C. L., Khan, A.  
644 U., El-Sayed, G. A., Knight, R. T., Guthrie, B. L., & Walker, H. C. (2020). Subcortical  
645 Intermittent Theta-Burst Stimulation (iTBS) Increases Theta-Power in Dorsolateral  
646 Prefrontal Cortex (DLPFC). *Frontiers in Neuroscience*, 14(January), 1–10.  
647 <https://doi.org/10.3389/fnins.2020.00041>
- 648 Bočková, M., Chládek, J., Jurák, P., Halánek, J., Baláž, M., & Rektor, I. (2011). Involvement of  
649 the subthalamic nucleus and globus pallidus internus in attention. *Journal of Neural  
650 Transmission*, 118(8), 1235–1245. <https://doi.org/10.1007/s00702-010-0575-4>
- 651 Brainard, D. H. (1997). The Psychophysics Toolbox. *Spatial Vision*, 10(4), 433–436.
- 652 Brittain, J.-S., Watkins, K. E., Joundi, R. A., Ray, N. J., Holland, P., Green, A. L., Aziz, T. Z., &  
653 Jenkinson, N. (2012). A role for the subthalamic nucleus in response inhibition during

- 654 conflict. *Journal of Neuroscience*, 32(39), 13396–13401.
- 655 <https://doi.org/10.1523/JNEUROSCI.2259-12.2012>
- 656 Brunenberg, E. J. L., Moeskops, P., Backes, W. H., Pollo, C., Cammoun, L., Vilanova, A.,  
657 Janssen, M. L. F., Visser-Vandewalle, V. E. R. M., ter Haar Romeny, B. M., Thiran, J. P., &  
658 Platel, B. (2012). Structural and resting state functional connectivity of the subthalamic  
659 nucleus: Identification of motor stn parts and the hyperdirect pathway. *PLoS ONE*, 7(6).  
660 <https://doi.org/10.1371/journal.pone.0039061>
- 661 Cavanagh, J. F., & Frank, M. J. (2014). Frontal theta as a mechanism for cognitive control.  
662 *Trends in Cognitive Sciences*, 18(8), 414–421. <https://doi.org/10.1016/j.tics.2014.04.012>
- 663 Cavanagh, J. F., Kumar, P., Mueller, A. A., Richardson, S. P., & Mueen, A. (2018). Diminished  
664 EEG habituation to novel events effectively classifies Parkinson’s patients. *Clinical*  
665 *Neurophysiology*, 129(2), 409–418. <https://doi.org/10.1016/j.clinph.2017.11.023>
- 666 Cavanagh, J. F., Sanguinetti, J. L., Allen, J. J. B., Sherman, S. J., & Michael, J. F. (2017). The  
667 Subthalamic Nucleus Contributes to Post-error Slowing. *Journal of Cognitive*  
668 *Neuroscience*, 139. [https://doi.org/10.1162/jocn\\_a\\_00659](https://doi.org/10.1162/jocn_a_00659)
- 669 Cavanagh, J. F., Wiecki, T. V., Cohen, M. X., Figueroa, C. M., Samanta, J., Sherman, S. J., &  
670 Frank, M. J. (2011). Subthalamic nucleus stimulation reverses mediofrontal influence over  
671 decision threshold. *Nature Neuroscience*, 14(11), 1462–1467.  
672 <https://doi.org/10.1038/nn.2925>
- 673 Cavanagh, J. F., Zambrano-Vazquez, L., & Allen, J. J. B. (2012). Theta lingua franca: A  
674 common mid-frontal substrate for action monitoring processes. *Psychophysiology*, 49(2),  
675 220–238. <https://doi.org/10.1111/j.1469-8986.2011.01293.x>
- 676 Chapin, J. K., & Nicolelis, M. A. L. (1999). Principal component analysis of neuronal ensemble

677 activity reveals multidimensional somatosensory representations. *Journal of Neuroscience*  
678 *Methods*, 94(1), 121–140. [https://doi.org/10.1016/S0165-0270\(99\)00130-2](https://doi.org/10.1016/S0165-0270(99)00130-2)

679 Chen, K.-H., Okerstrom, K. L., Kingyon, J. R., Anderson, S. W., Cavanagh, J. F., & Narayanan,  
680 N. S. (2016). Startle Habituation and Midfrontal Theta Activity in Parkinson Disease.  
681 *Journal of Cognitive Neuroscience*, 10(4), 431–441. [https://doi.org/10.1162/jocn\\_a\\_01012](https://doi.org/10.1162/jocn_a_01012)

682 Chen, W., de Hemptinne, C., Leibbrand, M., Miller, A. M., Larson, P. S., & Starr, P. A. (2018).  
683 Altered prefrontal theta and gamma activity during an emotional face processing task in  
684 parkinson disease. *Journal of Cognitive Neuroscience*, 31(11), 1768–1776.  
685 [https://doi.org/10.1162/jocn\\_a\\_01450](https://doi.org/10.1162/jocn_a_01450)

686 Chen, W., de Hemptinne, C., Miller, A. M., Leibbrand, M., Little, S. J., Lim, D. A., Larson, P.  
687 S., & Starr, P. A. (2020). Prefrontal-Subthalamic Hyperdirect Pathway Modulates  
688 Movement Inhibition in Humans. *Neuron*, 106(4), 579-588.e3.  
689 <https://doi.org/10.1016/j.neuron.2020.02.012>

690 Cohen, M. X. (2014). *Analyzing Neural Time Series Data: Theory and Practice*. The MIT Press.

691 Cohen, M. X., & Donner, T. H. (2013). Midfrontal conflict-related theta-band power reflects  
692 neural oscillations that predict behavior. *Journal of Neurophysiology*, 110(12), 2752–2763.  
693 <https://doi.org/10.1152/jn.00479.2013>

694 Cooper, P. S., Karayanidis, F., McKewen, M., McLellan-Hall, S., Wong, A. S. W., Skippen, P.,  
695 & Cavanagh, J. F. (2019). Frontal theta predicts specific cognitive control-induced  
696 behavioural changes beyond general reaction time slowing. *NeuroImage*, 189(November  
697 2018), 130–140. <https://doi.org/10.1016/j.neuroimage.2019.01.022>

698 Courchesne, E., Hillyard, S. A., & Galambos, R. (1975). Stimulus novelty, task relevance and  
699 the visual evoked potential in man. *Electroencephalography and Clinical Neurophysiology*,

700 39(2), 131–143. [https://doi.org/10.1016/0013-4694\(75\)90003-6](https://doi.org/10.1016/0013-4694(75)90003-6)

701 Debener, S., Makeig, S., Delorme, A., & Engel, A. K. (2005). What is novel in the novelty  
702 oddball paradigm? Functional significance of the novelty P3 event-related potential as  
703 revealed by independent component analysis. *Cognitive Brain Research*, 22(3), 309–321.  
704 <https://doi.org/10.1016/j.cogbrainres.2004.09.006>

705 Emmons, E., Kennedy, M., Kim, Y., & Narayanan, N. (2019). Corticostriatal stimulation  
706 compensates for medial frontal inactivation during interval timing. *Scientific Reports*, 9(1),  
707 1–9. <https://doi.org/10.1038/s41598-019-50975-7>

708 Emmons, E., Tunes-Chiuffa, G., Choi, J., Bruce, R., Weber, M., Kim, Y., & Narayanan, N.  
709 (2020). Temporal Learning Among Prefrontal and Striatal Ensembles. *Cerebral Cortex*  
710 *Communications*, 1(1), 1–12. <https://doi.org/10.1093/texcom/tgaa058>

711 Escera, C., Alho, K., Winkler, I., & Naatanen, R. (1998). *Neural Mechanisms of Involuntary*  
712 *Attention*. 590–604.

713 Fan, J. (2014). An information theory account of cognitive control. *Frontiers in Human*  
714 *Neuroscience*, 8(SEP), 1–16. <https://doi.org/10.3389/fnhum.2014.00680>

715 Giller, F., Bensmann, W., Mückschel, M., Stock, A. K., & Beste, C. (2020). Evidence for a  
716 causal role of superior frontal cortex theta oscillations during the processing of joint  
717 subliminal and conscious conflicts. *Cortex*, 132, 15–28.  
718 <https://doi.org/10.1016/j.cortex.2020.08.003>

719 Güntekin, B., Aktürk, T., Yıldırım, E., Yılmaz, N. H., Hanoğlu, L., & Yener, G. (2020).  
720 Abnormalities in auditory and visual cognitive processes are differentiated with theta  
721 responses in patients with Parkinson’s disease with and without dementia. *International*  
722 *Journal of Psychophysiology*, 153(April), 65–79.

- 723 <https://doi.org/10.1016/j.ijpsycho.2020.04.016>
- 724 Haynes, W. I. A., & Haber, S. N. (2013). The organization of prefrontal-subthalamic inputs in  
725 primates provides an anatomical substrate for both functional specificity and integration:  
726 Implications for basal ganglia models and deep brain stimulation. *Journal of Neuroscience*,  
727 33(11), 4804–4814. <https://doi.org/10.1523/JNEUROSCI.4674-12.2013>
- 728 He, X., Zhang, Y., Chen, J., Xie, C., Gan, R., Wang, L., & Wang, L. (2017). Changes in theta  
729 activities in the left posterior temporal region, left occipital region and right frontal region  
730 related to mild cognitive impairment in Parkinson’s disease patients. *International Journal*  
731 *of Neuroscience*, 127(1), 66–72. <https://doi.org/10.3109/00207454.2016.1143823>
- 732 Itthipuripat, S., Wessel, J. R., & Aron, A. R. (2013). Frontal theta is a signature of successful  
733 working memory manipulation. *Experimental Brain Research*, 224(2), 255–262.  
734 <https://doi.org/10.1007/s00221-012-3305-3>
- 735 Iyer, K. K., Au, T. R., Angwin, A. J., Copland, D. A., & Dissanayaka, N. N. (2020). Theta and  
736 gamma connectivity is linked with affective and cognitive symptoms in Parkinson’s disease.  
737 *Journal of Affective Disorders*, 277, 875–884. <https://doi.org/10.1016/j.jad.2020.08.086>
- 738 Kelley, R., Flouty, O., Emmons, E. B., Kim, Y., Kingyon, J., Wessel, J. R., Oya, H., Greenlee, J.  
739 D., & Narayanan, N. S. (2018). A human prefrontal-subthalamic circuit for cognitive  
740 control. *Brain*, 141(1), 205–216. <https://doi.org/10.1093/brain/awx300>
- 741 Kim, Y., Han, S. W., Alberico, S. L., Ruggiero, R. N., De Corte, B., Chen, K.-H., & Narayanan,  
742 N. S. (2017). Optogenetic Stimulation of Frontal D1 Neurons Compensates for Impaired  
743 Temporal Control of Action in Dopamine-Depleted Mice. *Current Biology*, 27(1), 39–47.  
744 <https://doi.org/10.1016/j.cub.2016.11.029>
- 745 Kim, Y., & Narayanan, N. S. (2019). Prefrontal D1 Dopamine-Receptor Neurons and Delta

746 Resonance in Interval Timing. *Cerebral Cortex*, 29(5), 2051–2060.  
747 <https://doi.org/10.1093/cercor/bhy083>

748 Kingyon, J. R., Behroozmand, R., Kelley, R., Oya, H., Kawasaki, H., Narayanan, N. S., &  
749 Greenlee, J. D. W. (2015). High-gamma band fronto-temporal coherence as a measure of  
750 functional connectivity in speech motor control. *Neuroscience*, 305, 15–25.  
751 <https://doi.org/10.1016/j.neuroscience.2015.07.069>.High-gamma

752 Kleiner, M., Brainard, D., & Pelli, D. (2007). What’s new in Psychtoolbox-3? *Perception* 36  
753 *ECVP Abstract Supplement*.

754 Lange, F., Seer, C., Loens, S., Wegner, F., Schrader, C., Dressler, D., Dengler, R., & Kopp, B.  
755 (2016). Neural mechanisms underlying cognitive inflexibility in Parkinson’s disease.  
756 *Neuropsychologia*, 93(May), 142–150.  
757 <https://doi.org/10.1016/j.neuropsychologia.2016.09.021>

758 Lavallee, C. F., Meemken, M. T., Herrmann, C. S., & Huster, R. J. (2014). When holding your  
759 horses meets the deer in the headlights: Time-frequency characteristics of global and  
760 selective stopping under conditions of proactive and reactive control. *Frontiers in Human*  
761 *Neuroscience*, 8(DEC), 1–12. <https://doi.org/10.3389/fnhum.2014.00994>

762 Messel, M. S., Raud, L., Hoff, P. K., Stubberud, J., & Huster, R. J. (2021). Frontal-midline theta  
763 reflects different mechanisms associated with proactive and reactive control of inhibition.  
764 *NeuroImage*, 241(July), 118400. <https://doi.org/10.1016/j.neuroimage.2021.118400>

765 Mikell, C. B., Sheehy, J. P., Youngerman, B. E., McGovern, R. A., Wojtasiewicz, T. J., Chan, A.  
766 K., Pullman, S. L., Yu, Q., Goodman, R. R., Schevon, C. A., & McKhann, G. M. (2014).  
767 Features and timing of the response of single neurons to novelty in the substantia nigra.  
768 *Brain Research*, 1542, 79–84. <https://doi.org/10.1016/j.brainres.2013.10.033>

- 769 Narayanan, N. S., Cavanagh, J. F., Frank, M. J., & Laubach, M. (2013). Common medial frontal  
770 mechanisms of adaptive control in humans and rodents. *Nature Publishing Group*, *16*(12),  
771 1888–1895. <https://doi.org/10.1038/nn.3549>
- 772 Narayanan, N. S., & Laubach, M. (2009). Dynamic imaging of brain function. In F. Hyder (Ed.),  
773 *Dynamic Brain Imaging: Multi-Modal Methods and In Vivo Applications* (pp. 135–165).  
774 [https://doi.org/10.1007/978-1-59745-543-5\\_1](https://doi.org/10.1007/978-1-59745-543-5_1)
- 775 Nolan, H., Whelan, R., & Reilly, R. B. (2010). FASTER: Fully Automated Statistical  
776 Thresholding for EEG artifact Rejection. *Journal of Neuroscience Methods*, *192*(1), 152–  
777 162. <https://doi.org/10.1016/j.jneumeth.2010.07.015>
- 778 Parker, K. L., Chen, K.-H., Kingyon, J. R., Cavanagh, J. F., & Narayanan, N. S. (2014). D1-  
779 dependent 4 Hz oscillations and ramping activity in rodent medial frontal cortex during  
780 interval timing. *Journal of Neuroscience*, *34*(50), 16774–166783.  
781 <https://doi.org/10.1523/JNEUROSCI.2772-14.2014>
- 782 Parker, K. L., Chen, K.-H., Kingyon, J. R., Cavanagh, J. F., & Narayanan, N. S. (2015). Medial  
783 frontal ~4-Hz activity in humans and rodents is attenuated in PD patients and in rodents  
784 with cortical dopamine depletion. *Journal of Neurophysiology*, *114*(2), 1310–1320.  
785 <https://doi.org/10.1152/jn.00412.2015>
- 786 Parmentier, F. B. R. (2014). The cognitive determinants of behavioral distraction by deviant  
787 auditory stimuli: A review. *Psychological Research*, *78*(3), 321–338.  
788 <https://doi.org/10.1007/s00426-013-0534-4>
- 789 Parmentier, F. B. R., Elford, G., Escera, C., Andrés, P., & Miguel, I. S. (2008). The cognitive  
790 locus of distraction by acoustic novelty in the cross-modal oddball task. *Cognition*, *106*(1),  
791 408–432. <https://doi.org/10.1016/j.cognition.2007.03.008>

- 792 Parmentier, F. B. R., & Hebrero, M. (2013). Cognitive control of involuntary distraction by  
793 deviant sounds. *Journal of Experimental Psychology: Learning Memory and Cognition*,  
794 *39*(5), 1635–1641. <https://doi.org/10.1037/a0032421>
- 795 Parmentier, F. B. R., Maybery, M. T., & Elsley, J. (2010). The involuntary capture of attention  
796 by novel feature pairings: A study of voice-location integration in auditory sensory  
797 memory. *Attention, Perception, and Psychophysics*, *71*(7), 1439–1459.  
798 <https://doi.org/10.3758/APP>
- 799 Pelli, D. G. (1997). The VideoToolbox software for visual psychophysics: Transforming  
800 numbers into movies. In *Spatial Vision* (Vol. 10, Issue 4, pp. 437–442).  
801 <https://doi.org/10.1163/156856897X00366>
- 802 Polich, J. (2007). Updating P300: An Integrative Theory of P3a and P4b. *Clinical*  
803 *Neurophysiology*, *118*(10), 2128–2148.  
804 <https://doi.org/10.1016/j.clinph.2007.04.019>.Updating
- 805 Ranganath, C., & Rainer, G. (2003). Cognitive neuroscience: Neural mechanisms for detecting  
806 and remembering novel events. *Nature Reviews Neuroscience*, *4*(3), 193–202.  
807 <https://doi.org/10.1038/nrn1052>
- 808 Rosenberg, J. R., Amjad, A. M., Breeze, P., Brillinger, D. R., & Halliday, D. M. (1989). The  
809 Fourier approach to the identification of functional coupling between neuronal spike trains.  
810 *Progress in Biophysics and Molecular Biology*, *53*(1), 1–31. [https://doi.org/10.1016/0079-](https://doi.org/10.1016/0079-6107(89)90004-7)  
811 [6107\(89\)90004-7](https://doi.org/10.1016/0079-6107(89)90004-7)
- 812 Scangos, K. W., Carter, C. S., Gurkoff, G., Zhang, L., & Shahlaie, K. (2017). A pilot study of  
813 subthalamic theta frequency deep brain stimulation for cognitive dysfunction in Parkinson’s  
814 disease. *Brain Stimulation*, *11*, 456–458. <https://doi.org/10.1016/j.brs.2017.11.014>



- 815 Singh, A., Cole, R. C., Espinoza, A. I., Brown, D., Cavanagh, J. F., & Narayanan, N. S. (2020).  
816 Frontal theta and beta oscillations during lower-limb movement in Parkinson's disease.  
817 *Clinical Neurophysiology*, *131*(3), 694–702. <https://doi.org/10.1016/j.clinph.2019.12.399>
- 818 Singh, A., Cole, R. C., Espinoza, A. I., Evans, A., Cao, S., Cavanagh, J. F., & Narayanan, N. S.  
819 (2021). Timing variability and midfrontal ~4 Hz rhythms correlate with cognition in  
820 Parkinson's disease. *Npj Parkinson's Disease*, 2020.10.26.356154.  
821 <https://doi.org/10.1038/s41531-021-00158-x>
- 822 Singh, A., Richardson, S. P., Narayanan, N. S., & Cavanagh, J. F. (2018). Mid-frontal theta  
823 activity is diminished during cognitive control in Parkinson's disease. *Neuropsychologia*,  
824 *117*(May), 113–122. <https://doi.org/10.1016/j.neuropsychologia.2018.05.020>
- 825 Soikkeli, R., Partanen, J., Soininen, H., Pääkkönen, A., & Riekkinen, P. (1991). Slowing of EEG  
826 in Parkinson's disease. *Electroencephalography and Clinical Neurophysiology*, *79*(3), 159–  
827 165. [https://doi.org/10.1016/0013-4694\(91\)90134-P](https://doi.org/10.1016/0013-4694(91)90134-P)
- 828 Sokolov, E. N. (1962). *Higher Nervous Functions: The Orienting Reflex*.
- 829 Solís-Vivanco, R., Rodríguez-Violante, M., Cervantes-Arriaga, A., Justo-Guillén, E., & Ricardo-  
830 Garcell, J. (2018). Brain oscillations reveal impaired novelty detection from early stages of  
831 Parkinson's disease. *NeuroImage: Clinical*, *18*(March), 923–931.  
832 <https://doi.org/10.1016/j.nicl.2018.03.024>
- 833 Töllner, T., Wang, Y., Makeig, S., Müller, H. J., Jung, T.-P., & Gramann, K. (2017). Two  
834 Independent Frontal Midline Theta Oscillations during Conflict Detection and Adaptation in  
835 a Simon-Type Manual Reaching Task. *The Journal of Neuroscience*, *37*(9), 2504–2515.  
836 <https://doi.org/10.1523/jneurosci.1752-16.2017>
- 837 Wessel, J. R., & Huber, D. E. (2019). Correction: Frontal cortex tracks surprise separately for

838 different sensory modalities but engages a common inhibitory control mechanism. *PLoS*  
839 *Computational Biology*, 15(10), 1–26. <https://doi.org/10.1371/journal.pcbi.1007420>

840 Wessel, J. R., Jenkinson, N., Brittain, J.-S., Voets, S. H. E. M., Aziz, T. Z., & Aron, A. R.  
841 (2016). Surprise disrupts cognition via a fronto-basal ganglia suppressive mechanism.  
842 *Nature Communications*, 7, 1–10. <https://doi.org/10.1038/ncomms11195>

843 Zavala, B. A., Tan, H., Little, S., Ashkan, K., Hariz, M., Foltynie, T., Zrinzo, L., Zaghloul, K.  
844 A., & Brown, P. (2014). Midline frontal cortex low-frequency activity drives subthalamic  
845 nucleus oscillations during conflict. *Journal of Neuroscience*, 34(21), 7322–7333.  
846 <https://doi.org/10.1523/JNEUROSCI.1169-14.2014>

847 Zeng, K., Drummond, N. M. ., Ghahremani, A., Saha, U., Kalia, S. K., Hodaie, M., Lozano, A.  
848 M., Aron, A. R., & Chen, R. (2021). Fronto-subthalamic phase synchronization and cross-  
849 frequency coupling during conflict processing. *NeuroImage*, 238(March), 118205.  
850 <https://doi.org/10.1016/j.neuroimage.2021.118205>

851 Zink, C. F., Pagnoni, G., Chappelow, J., Martin-Skurski, M., & Berns, G. S. (2006). Human  
852 striatal activation reflects degree of stimulus saliency. *NeuroImage*, 29(3), 977–983.  
853 <https://doi.org/10.1016/j.neuroimage.2005.08.006>

854 Zuure, M. B., Hinkley, L. B., Tiesinga, P. H. E., Nagarajan, S. S., & Cohen, M. X. (2020).  
855 Multiple midfrontal thetas revealed by source separation of simultaneous MEG and EEG.  
856 *Journal of Neuroscience*, 40(40), 7702–7713. [https://doi.org/10.1523/JNEUROSCI.0321-](https://doi.org/10.1523/JNEUROSCI.0321-20.2020)  
857 [20.2020](https://doi.org/10.1523/JNEUROSCI.0321-20.2020)

858

859

860 **Tables**

861 **Table 1: EEG participant demographics**

| <b>Group</b>   | <b>Gender</b> | <b>N</b>            | <b>Age</b>     | <b>Age</b>   | <b>Right</b>        | <b>Education</b> | <b>MoCA</b>    | <b>UPDRS</b>   | <b>LEDD</b>      | <b>Disease</b> |
|----------------|---------------|---------------------|----------------|--------------|---------------------|------------------|----------------|----------------|------------------|----------------|
|                |               | <b>(%)</b>          | <b>median</b>  | <b>range</b> | <b>Handed</b>       | <b>median</b>    | <b>median</b>  | <b>Part 3</b>  | <b>median</b>    | <b>Durati</b>  |
|                |               |                     | <b>yrs</b>     | <b>yrs</b>   | <b>(%)</b>          | <b>yrs</b>       | <b>(Q1-Q3)</b> | <b>median</b>  | <b>(Q1 – Q3)</b> | <b>media</b>   |
|                |               |                     | <b>(Q1-Q3)</b> |              |                     | <b>(Q1-Q3)</b>   |                | <b>(Q1-Q3)</b> |                  | <b>yrs</b>     |
|                |               |                     |                |              |                     |                  |                |                |                  | <b>(Q1-Q</b>   |
| <b>Control</b> | Total         | 35                  | 71.0           | 52-86        | 32                  | 16.0             | 27.0           | -              | -                | -              |
|                |               |                     | (64.0-75.5)    |              | (91%)               | (15.0-18.0)      | (26.0-28.0)    |                |                  |                |
|                | F             | 19                  | 68.0           | 52-86        | 17                  | 16.0             | 27.0           | -              | -                | -              |
|                |               | (54.3%)             | (62.5-72.5)    |              | (89.4%)             | (14.0-17.0)      | (27.0-28.0)    |                |                  |                |
|                | M             | 16                  | 71.5           | 60-85        | 15                  | 17.0             | 26.0           | -              | -                | -              |
|                |               | (46.7%)             | (67.0-78.0)    |              | (93.8%)             | (16.0-18.0)      | (26.0-28.0)    |                |                  |                |
| <b>PD</b>      | Total         | 50                  | 68.0           | 52-86        | 45                  | 15.0             | 25.5           | 11.5           | 850              | 4.5            |
|                |               |                     | (60.3-72.0)    |              | (90%)               | (13.0-18.0)      | (22.3-27.0)    | (7.0-17.0)     | (462.5-1150.0)   | (2.0-6.0)      |
|                | F             | 19                  | 68.0           | 53-86        | 16                  | 16.0             | 27.0           | 12.0           | 600              | 5.0            |
|                |               | (38.0%)             | (66.0-71.5)    |              | (84.2%)             | (14.0-18.0)      | (24.5-28.0)    | (7.5-16.5)     | (375.0-937.5)    | (2.0-7.0)      |
|                | M             | 31                  | 66.0           | 52-84        | 29                  | 14.0             | 24.0           | 11.0           | 950              | 4.0            |
|                |               | (62.0%)             | (60.0-73.0)    |              | (93.5%)             | (12.0-17.8)      | (22.0-26.0)    | (6.0-17.0)     | (587.5-1315.0)   | (2.5-6.0)      |
| Control        |               | p=0.21              | p=0.19         |              | p=1.0               | p=0.10           | p=0.001        |                |                  |                |
| vs PD          |               | (M vs F, $\chi^2$ ) | (Wilcoxon)     |              | (R vs L, $\chi^2$ ) | (Wilcoxon)       | (Wilcoxon)     |                |                  |                |

862

863

864 **Table 2. Intraoperative patient-volunteer demographics**

| <b>Gender</b> | <b>N</b> | <b>Age</b><br><b>median</b><br><b>yrs</b><br><b>(Q1-Q3)</b> | <b>Age range</b><br><b>yrs</b> | <b>Right</b><br><b>Handed</b><br><b>(%)</b> | <b>LEDD</b><br><b>median</b><br><b>(Q1-Q3)</b> | <b>Disease</b><br><b>Duration</b><br><b>median</b><br><b>yrs</b><br><b>(Q1-Q3)</b> |
|---------------|----------|-------------------------------------------------------------|--------------------------------|---------------------------------------------|------------------------------------------------|------------------------------------------------------------------------------------|
| <b>Total</b>  | 18       | 67.0<br>(62.3-68.5)                                         | 53-71                          | 15 (83%)                                    | 975.0<br>(687.5-1175.0)                        | 7.0<br>(3.5-10.8)                                                                  |
| <b>F</b>      | 4 (22%)  | 62.5<br>(57.5-68.0)                                         | 53-71                          | 3<br>(75%)                                  | 921.5<br>(819.8-987.5)                         | 12.0<br>(10.8-13.5)                                                                |
| <b>M</b>      | 14 (78%) | 67.0<br>(63.0-68.5)                                         | 53-71                          | 12 (86%)                                    | 1018.5<br>(687.5-1218.8)                       | 6.5<br>(3.0-7.0)                                                                   |

865

866
